# Supplementary material for: A gallic acid based metal organic framework derived NiS/C anode for sodium ion batteries
Source: Royal Society of Chemistry journal article supplement (doi:10.1039/d1se00341k), 2021-01-01
Supplement: d1se00341k1.pdf [file d1se00341k1.pdf]

Supplementary Information

## Gallic Acid Based Metal Organic Framework Derived NiS/C Anode for Sodium Ion Batteries

Mehbare Dogrusoz<sup>a,b</sup>, Thomas Devic<sup>c</sup>, Ali Şems Ahsen<sup>d</sup>, and Rezan Demir-Cakan<sup>a,b\*</sup>

<sup>a</sup> Gebze Technical University, Department of Chemical Engineering, 41400 Gebze, Kocaeli, Turkey

<sup>b</sup> Gebze Technical University, Institute of Nanotechnology, 41400 Gebze, Kocaeli, Turkey

<sup>c</sup> Institut des Materiaux Jean Rouxel (IMN), UMR 6502, CNRS Université de Nantes, 44322 Nantes, France

<sup>d</sup> Gebze Technical University, Department of Physics, 41400 Gebze, Kocaeli, Turkey

\*Corresponding Author: demir-akan@gtu.edu.tr

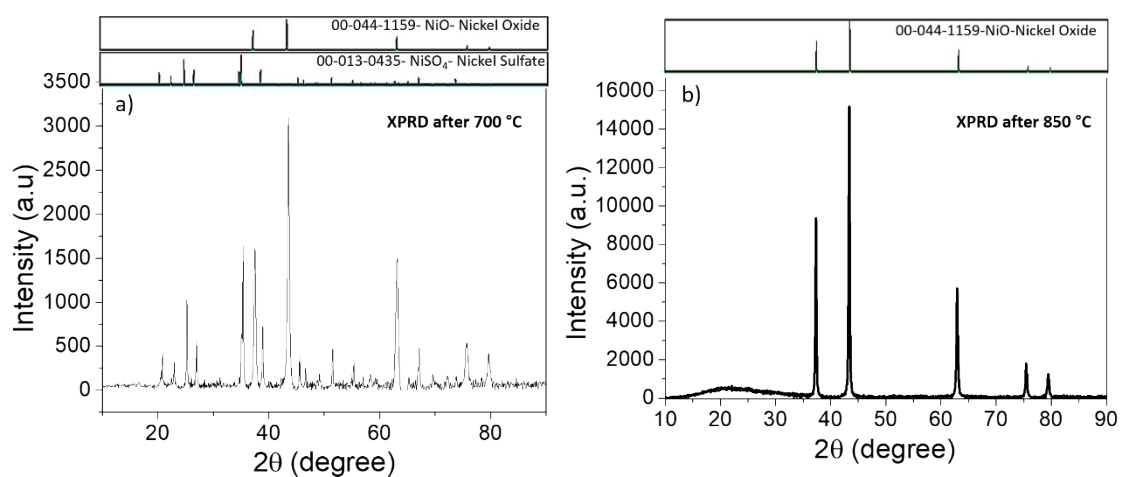

**Figure SI-1.** X- Ray Powder Diffraction Pattern of Ni/C composite **a)** after 700 °C TGA and **b)** 850 °C TGA tests under air atmosphere, at a heating rate of 10 °C min<sup>-1</sup>.

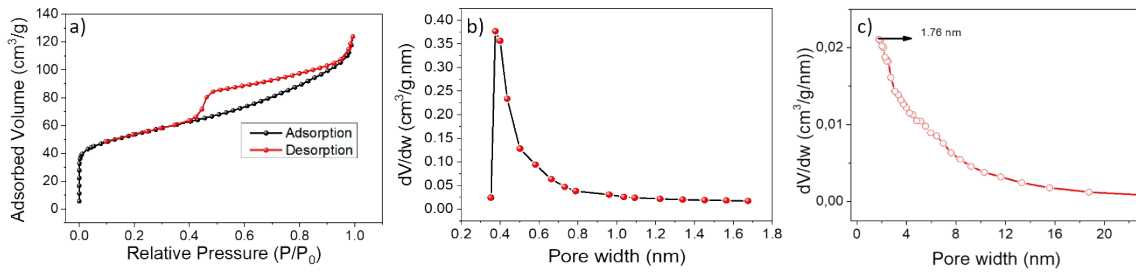

**Figure SI-2.** a) BET specific surface area, b) pore size distribution according to the Horvath-Kawazoe method from the adsorption branch and c) Barrett-Joyner-Halenda (BJH) method from the adsorption branch

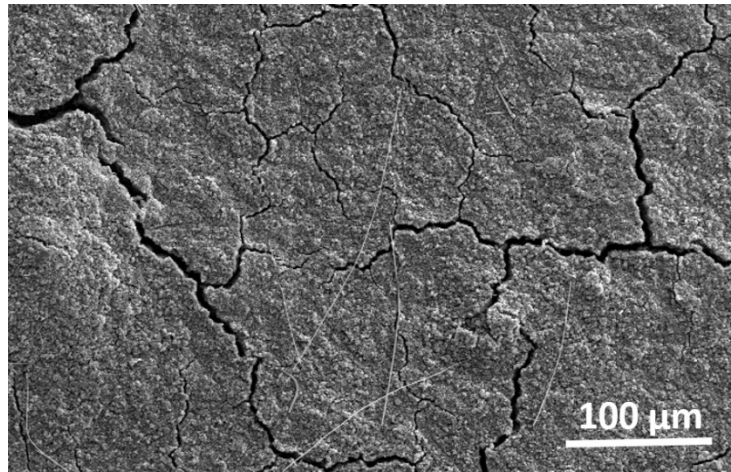

**Figure SI-3.** Post-mortem analysis of electrode surface after 500 charge-discharge cycles at 591 mA·g<sup>-1</sup> current density.
